# Supplementary material
Source: PubMed Central journal article supplement (PMC1838717)
Supplement: pnas_0608845103_1.pdf [file pnas_0608845103_1.pdf]

|                                             | <b>PBs only</b><br>(DMSO)     | <b>PBs &amp; SGs</b><br>(HIPPI) |
|---------------------------------------------|-------------------------------|---------------------------------|
| <b>% Intensity</b><br>relative to cytoplasm | <b>1.28%</b><br>(0.22%-2.45%) | <b>5.12%</b><br>(2.50%-11.84%)  |
| <b>% Volume</b>                             | <b>0.30±0.20%</b>             | <b>0.87±0.21%</b>               |
