# Supplementary material
Source: PubMed Central journal article supplement (PMC1838717)

**a**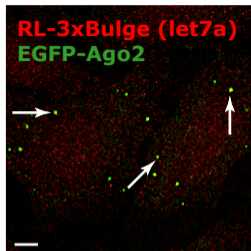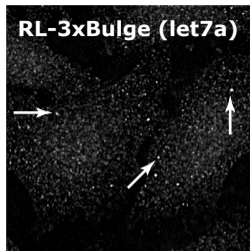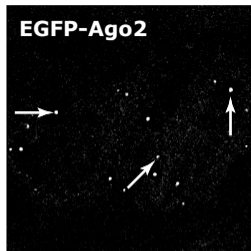**b**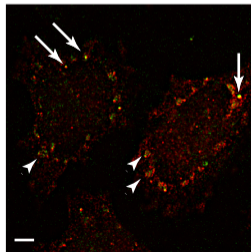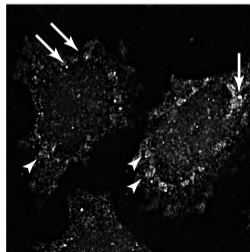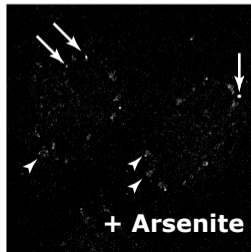

Supplement: pnas_0608845103_2.pdf [file pnas_0608845103_2.pdf]

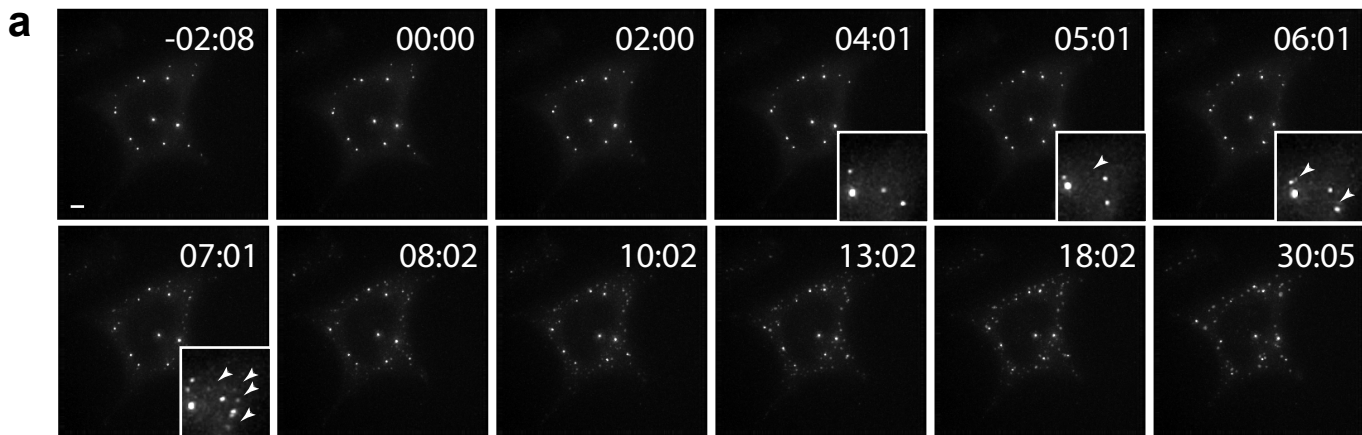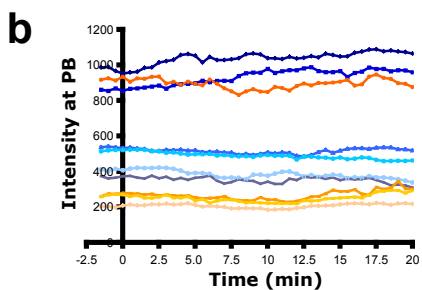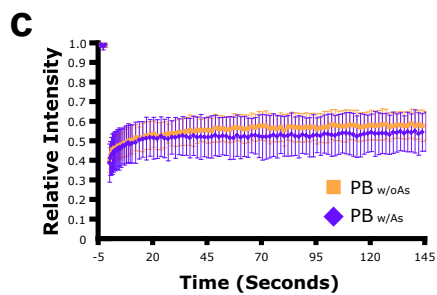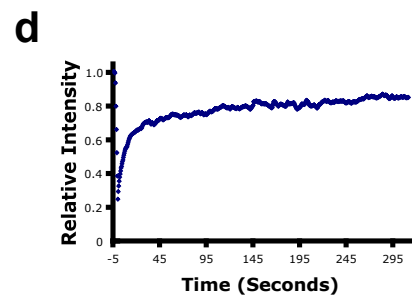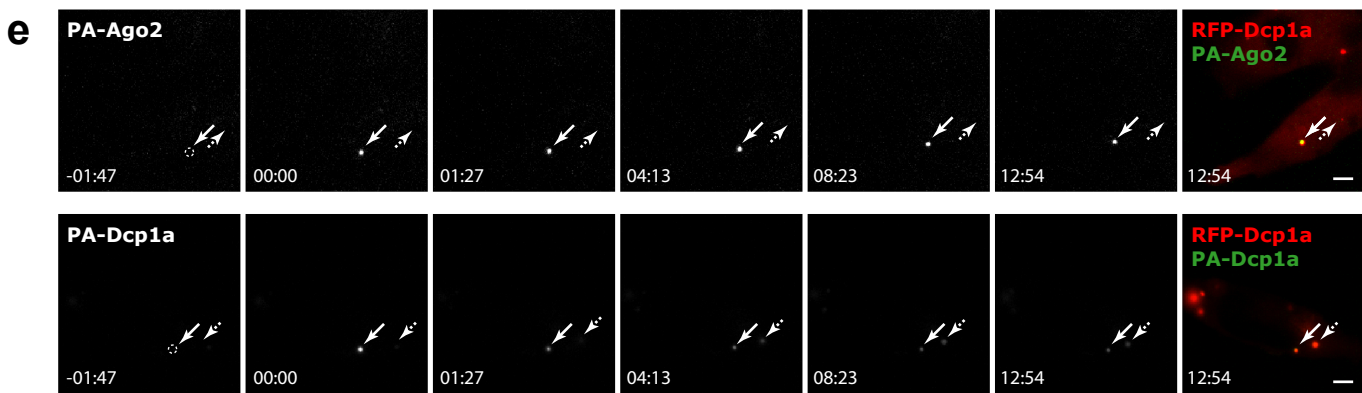

Supplement: pnas_0608845103_3.pdf [file pnas_0608845103_3.pdf]

**a** Scheme of small RNA detection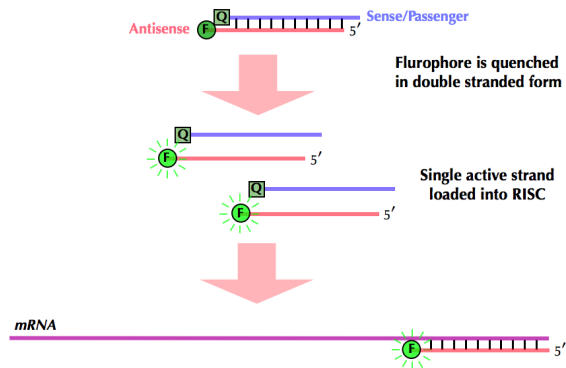**b**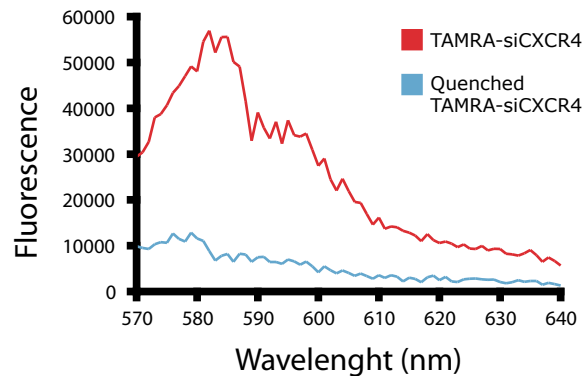**c**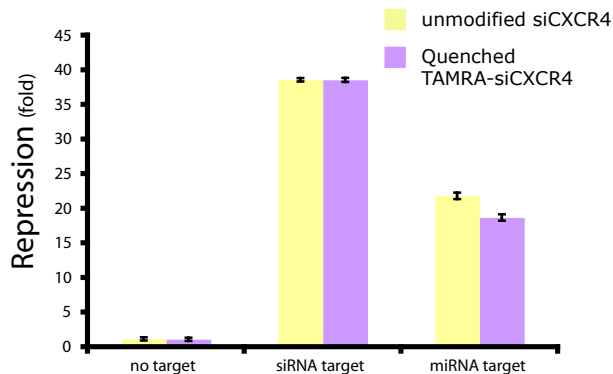

Supplement: pnas_0608845103_4.pdf [file pnas_0608845103_4.pdf]

**a**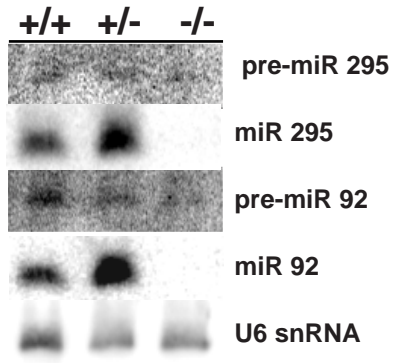**b**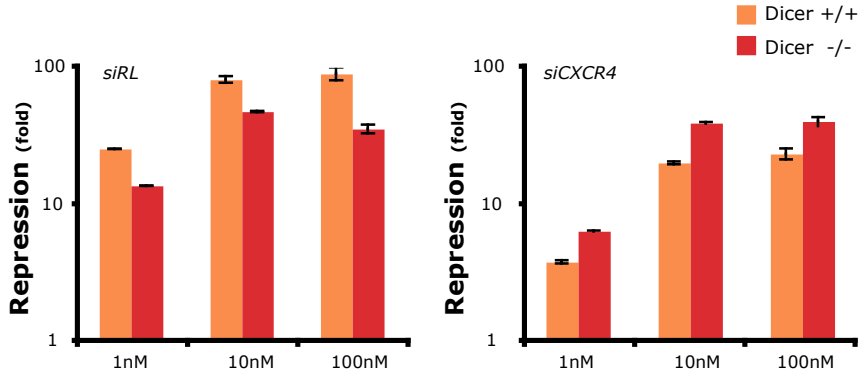

Supplement: pnas_0608845103_5.pdf [file pnas_0608845103_5.pdf]
